# Supplementary material
Source: PubMed Central journal article supplement (PMC5572688)
Supplement: supp_fj.201601291R_Supplemental_Data.pdf [file supp_fj.201601291R_Supplemental_Data.pdf]

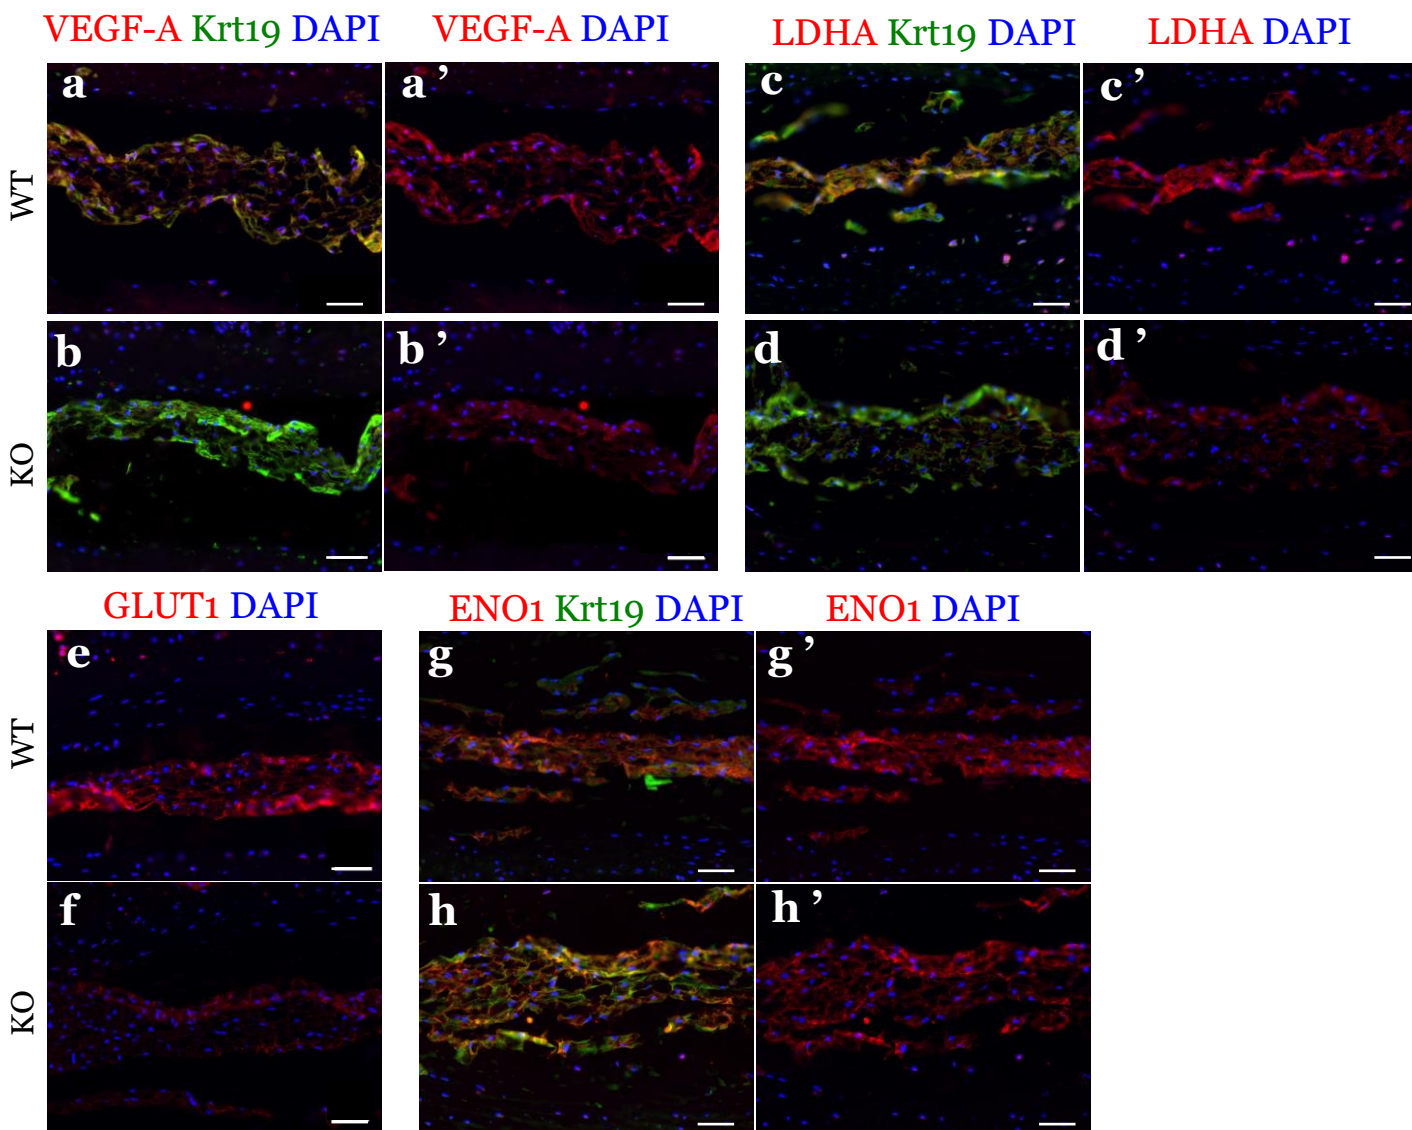

**Figure S1: PHD3 null mice show decreased expression of select HIF-1 target genes in NP tissue at 5 months old.** a-h') Representative immunofluorescence staining of intervertebral disc sections from 5-month-old wild-type ( $PHD3^{+/+}$ ) and knock-out ( $PHD3^{-/-}$ ) mice shows decreased staining of HIF-1 targets VEGF-A (a-b'), LDHA (c-d'), and GLUT1 (e, f) in knock-out mice compared to wild-type mice. In contrast, another HIF-1 target, ENO1, shows comparable expression in  $PHD3^{+/+}$  (g, g') and  $PHD3^{-/-}$  (h, h') mice. Krt19 was used as a marker to label NP tissue compartment with VEGF-A, LDHA, and ENO1. Scale bar = 50  $\mu$ m. Images are representative from three independent littermate groups.

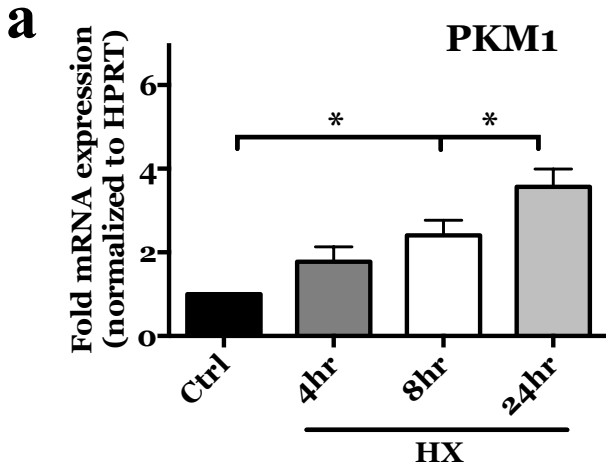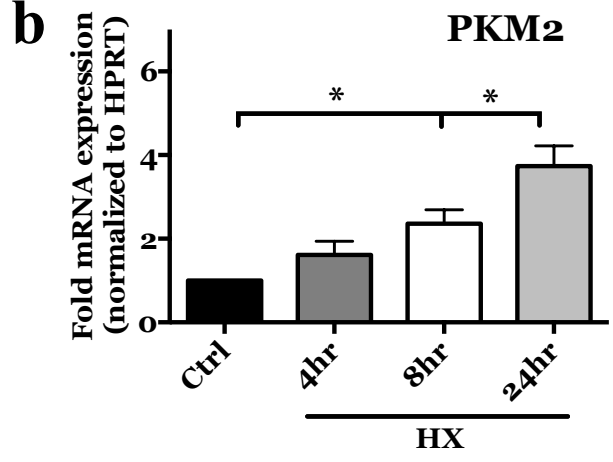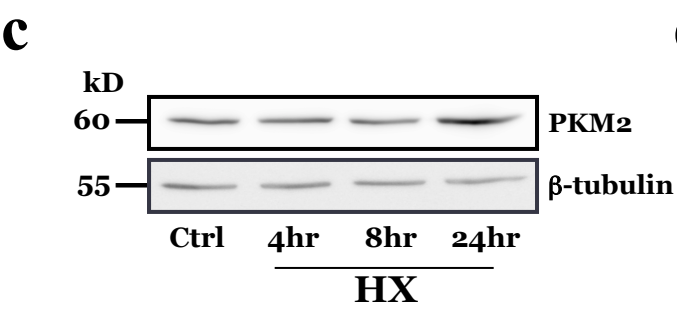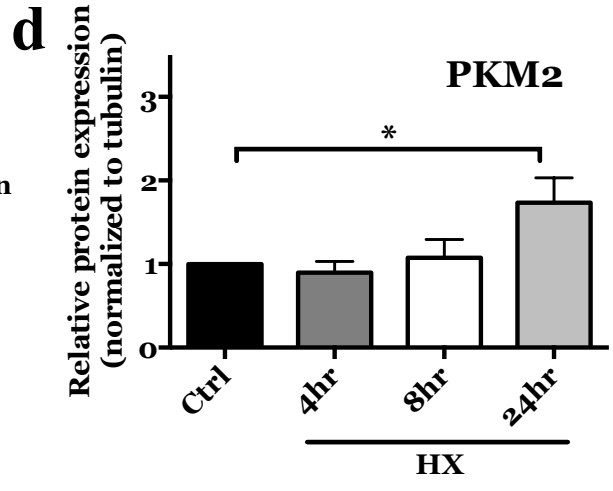

**Figure S2: PKM2 expression in NP cells is hypoxia sensitive.** a, b) mRNA expression of *Pkm1* (a) and *Pkm2* (b) isoforms in rat NP cells following hypoxic culture for 4-24 h. c, d) Western blot (c) and corresponding densitometric analysis (d) of PKM2 expression in NP cells cultured under hypoxia for 4-24 hours. Data is represented as mean  $\pm$  S.E. of three independent experiments ( $n = 3$ ); \*,  $p < 0.05$ .

**Table S1:** Primer sequences used for Chromatin Immunoprecipitations

| <b>Gene Name</b>  | <b>Primer Location</b> |            | <b>Primer Sequence</b>     |                            |
|-------------------|------------------------|------------|----------------------------|----------------------------|
| <b>HRE Region</b> | <b>Start</b>           | <b>End</b> | <b>Forward</b>             | <b>Reverse</b>             |
| Vegfa             | -1026                  | -900       | 5'-agttccctggcaacatctgg-3' | 5'-gagggagacgacctgtggaa-3' |
| Slc2a1            | -3207                  | -3038      | 5'-ccgggctgtcttactcactc-3' | 5'-ccaggtgcacatgatgattc-3' |
| Ldha              | -175                   | -26        | 5'-ccacccttacagagccatcg-3' | 5'-aaatggaagctccgtgctga-3' |
